# Supplementary material for: Aflibercept more effectively weans patients with neovascular age-related macular degeneration off therapy compared with bevacizumab
Source: JCI journal article supplement (doi:10.1172/jci159125), 2022-11-22
Supplement: sd1 [file 1]

301 Moved Permanently

# Moved Permanently

The document has moved here.
